# Supplementary material for: A developmental framework linking neurogenesis and circuit formation in the Drosophila CNS
Source: eLife. 2021 May 11;10:e67510. doi: 10.7554/eLife.67510 (PMC8139831; doi:10.7554/eLife.67510)
Supplement: Supplementary file 1. — Neurons are annotated for names/synonyms, parental neuroblast, hemilineage, and radial position. [file elife-67510-supp1.csv]

Lineage	Names	Synonyms	Hemilineage	TemporalCohort	Cortex_Neurite_Length	CATMAIDSKID
NB1-2	A01c1	eIN-2	Dorsal	1	9.67	[5084467,5084467]
NB1-2	A01d1		Dorsal	1	0.98	[11106522,11106522]
NB1-2	A01d2		Dorsal	1	4.2	[3995976,3995976]
NB1-2	A01d3	eIN-3, Ifb-F	Dorsal	1	0.75	[9544992,9544992]
NB1-2	A01d4		Dorsal	1	7.31	[8840084,8840084]
NB1-2	A01j		Dorsal	1	7.65	[10380647,10380647]
NB1-2	A01c2		Dorsal	2	14.83	[4113533,4113533]
NB1-2	A01b2		Dorsal	3	18.61	[7924478,7924478]
NB1-2	A01a1		Dorsal	4	22.62	[12140925,12140925]
NB1-2	A01a2		Dorsal	4	23.03	[6931770,6931770]
NB1-2	A01m		Ventral	1	7.28	[2042488,2042488]
NB1-2	A01n		Ventral	1	4.44	[4394777,4394777]
NB2-1	A02i	PMSI	Dorsal	2	13.58	[2798040,2798040]
NB2-1	A02j	PMSI	Dorsal	2	16.68	[18769231,18769231]
NB2-1	A02g	PMSI	Dorsal	3	18.21	[14866842,14866842]
NB2-1	A02e	PMSI	Dorsal	4	26.68	[7992966,7992966]
NB2-1	A02f	PMSI	Dorsal	4	23.05	[4071032,4071032]
NB2-1	A02h	PMSI	Dorsal	4	24.45	[12820178,12820178]
NB2-1	A02m	PMSI, maybe mCSIs	Ventral	1	8.73	[4778439,4778439]
NB2-1	A02n	PMSI, maybe mCSIs	Ventral	1	10.23	[3546835,3546835]
NB2-1	A02k	PMSI	Ventral	2	13.66	[4715415,4715415]
NB2-1	A02a	PMSI	Ventral	3	20.11	[13004884,13004884]
NB2-1	A02c	PMSI	Ventral	3	20.49	[3504632,3504632]
NB2-1	A02b	PMSI	Ventral	4	26.58	[6578062,6578062]
NB2-1	A02d	PMSI	Ventral	4	22.21	[14046279,14046279]
NB3-3	A08j1	Likely EL interneuron	Ventral	2	12.88	[10929797,10929797]
NB3-3	A08j2	Likely EL interneuron	Ventral	2	15.34	[8057753,8057753]
NB3-3	A08j3	Likely EL interneuron	Ventral	2	16.99	[11455472,11455472]
NB3-3	A08x	Likely EL interneuron	Ventral	2	11.79	[5343578,5343578]
NB3-3	A08m	Likely EL interneuron	Ventral	3	20.83	[4060628,4060628]
NB3-3	A08s1	Likely EL interneuron	Ventral	3	19.96	[16009772,16009772]
NB3-3	A08c2	Likely EL interneuron	Ventral	4	22.95	[8059283,8059283]
NB3-3	A08e1	EL interneuron	Ventral	4	24.47	[7876385,7876385]
NB3-3	A08e2	EL interneuron	Ventral	4	21.16	[12809923,12809923]
NB3-3	A08e3	EL interneuron	Ventral	4	24.21	[8421329,8421329]
NB3-3	A08o	EL interneuron	Ventral	4	21.38	[17399735,17399735]
NB4-1	A14a2		Dorsal	2	14.92	[7855607,7855607]
NB4-1	A14a3		Dorsal	2	12.08	[12820277,12820277]
NB4-1	A14a1		Dorsal	3	20.26	[10299625,10299625]
NB4-1	A14b		Dorsal	4	21.89	[12820085,12820085]
NB4-1	A14e		Ventral	4	23.29	[4123145,4123145]
NB4-1	A14f		Ventral	4	25.88	[16504350,16504350]
NB4-1	A14g		Ventral	4	23.21	[4740178,4740178]
NB4-1	A14h		Ventral	4	22.58	[17114293,17114293]
NB5-2	A06b1	Saaghi-6	Dorsal	1	7.15	[12042425,12042425]
NB5-2	A06c		Dorsal	1	10.8	[12809976,12809976]
NB5-2	A06b2	Saaghi-4	Dorsal	2	15.08	[12040460,12040460]
NB5-2	A06g2	Saaghi-5	Dorsal	2	17.33	[12039793,12039793]
NB5-2	A06e	Saaghi-3	Dorsal	3	19.02	[10474936,10474936]
NB5-2	A06g1		Dorsal	3	17.95	[8235049,8235049]
NB5-2	A06l	Saaghi-1	Dorsal	3	17.94	[18418512,18418512]
NB5-2	A06a1		Dorsal	4	23.81	[10858401,10858401]
NB5-2	A06a2		Dorsal	4	27.07	[4542822,4542822]
NB5-2	A06f	Saaghi-2	Dorsal	4	24.19	[4386719,4386719]
NB5-2	A06d		Ventral	1	6.75	[19703140,19703140]
NB5-2	A06k		Ventral	1	7.7	[18458734,18458734]
NB5-2	A06i2		Ventral	2	16.27	[18509063,18509063]
NB5-2	A06i3		Ventral	2	15.15	[7343002,7343002]
NB5-2	A06h2	Jaam-2	Ventral	3	17.92	[11466247,11466247]
NB5-2	A06i1		Ventral	3	18.58	[14522404,14522404]
NB5-2	A06h1	Jaam-1	Ventral	4	21.72	[8196192,8196192]
NB5-2	A06i4		Ventral	4	22.74	[15560233,15560233]
NB5-2	A06j	Jaam-3	Ventral	4	26.19	[11928389,11928389]
NB7-1	A03c1		Dorsal	1	10.9	[17970304,17970304]
NB7-1	A03c2		Dorsal	1	6.36	[18963687,18963687]
NB7-1	A03t3		Dorsal	3	18.58	[6570401,6570401]
NB7-1	A03a4	eIN-5	Dorsal	4	22.63	[8688631,8688631]
NB7-1	A03t1		Dorsal	4	23.24	[10089252,10089252]
NB7-1	A03t2		Dorsal	4	24.23	[12014775,12014775]
NB7-1	A03k		Ventral	2	17.23	[16528100,16528100]
NB7-1	A03d1		Ventral	3	19.23	[10273060,10273060]
NB7-1	A03e		Ventral	3	18.1	[7827470,7827470]
NB7-1	A03b		Ventral	4	23.6	[16272893,16272893]
NB7-1	A03f		Ventral	4	25.5	[16531827,16531827]
NB7-1	A03o1		Ventral	4	22.66	[4302562,4302562]
NB7-1	A03o2		Ventral	4	24.5	[4039711,4039711]
NB7-4	A23b1		Ventral	2	17.57	[6330796,6330796]
NB7-4	A23b3		Ventral	2	15.68	[10054666,10054666]
NB7-4	A23b2		Ventral	4	22.38	[10804041,10804041]
NB7-4	A23m	Griddle-1	Ventral	4	23.78	[7195651,7195651]
